# Supplementary material for: The novel antimicrobial peptide PXL150 in the local treatment of skin and soft tissue infections
Source: PubMed Central journal article supplement (PMC3602619; doi:10.1007/s00253-012-4439-8), 2012-10-04
Supplement: 253_2012_4439_MOESM1_ESM.pdf [file 253_2012_4439_MOESM1_ESM.pdf]

# The novel antimicrobial peptide PXL150 in the local treatment of skin and soft tissue infections

Applied Microbiology and Biotechnology

Emma Myhrman<sup>1</sup>, Joakim Håkansson<sup>1</sup>, Kerstin Lindgren<sup>1</sup>, Camilla Björn<sup>1</sup>, Veronika Sjöstrand<sup>1</sup> and Margit Mahlapuu<sup>1</sup>

<sup>1</sup>Pergamum AB, Arvid Wallgrens Backe 20, 413 46 Gothenburg, Sweden

margit.mahlapuu@pergamum.com

a

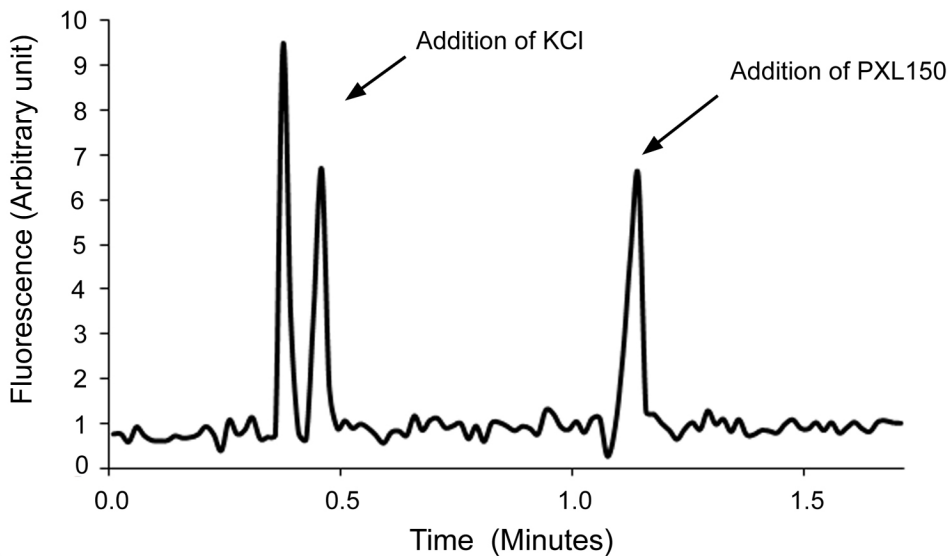

b

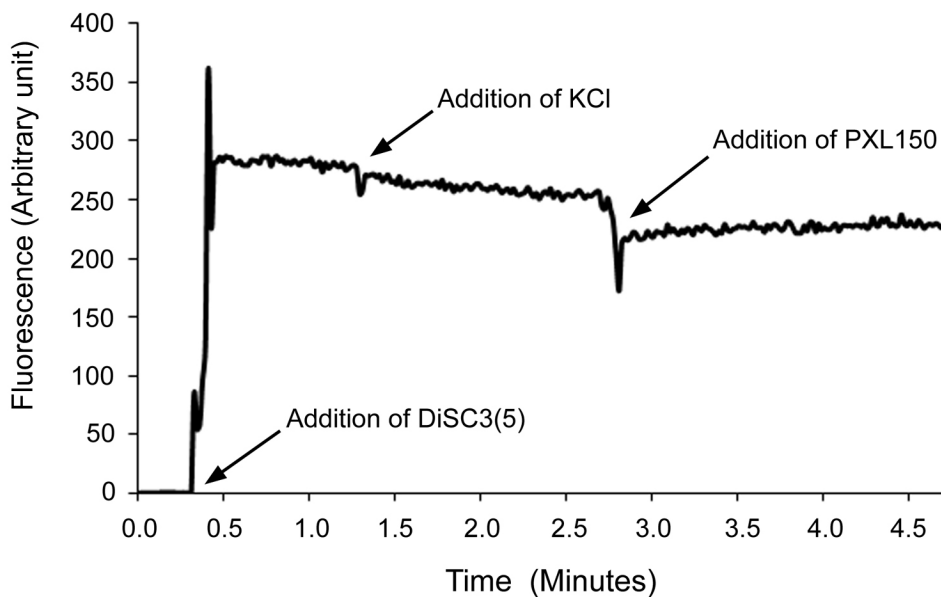

Online resource 1

(a) Assessment of auto-fluorescence of Tris buffer, supplemented with 100 mM KCl and supplemented with PXL150 160 µg/ml at 670 nm. (b) Assessment of inhibition of the fluorescence of DiSC3(5) in Tris buffer after addition of 100 mM KCl and addition of PXL150 160 µg/ml at 670 nm.
